# Supplementary material for: Characteristics and Pathogenicity of Discula theae-sinensis Causing Camellia sinensis Anthracnose, and Synergistic Effect with Colletotrichum spp.
Source: Preprints.org preprint supplement (doi:10.20944/preprints202308.0481.v1), 2023-08-07
Supplement: Supplementary file 1 [file supplementary]

**
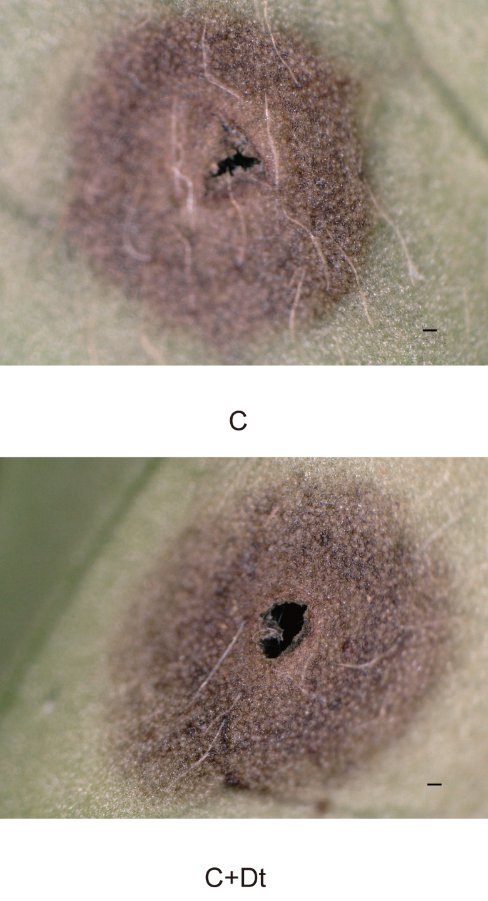
**

**Figure S1.** Details of lesions of inoculation with Cc and dual inoculations of Cc and Dt

**Table S1.** Primers used in this study

| Gene | Primer | Sequence (5’→3’) | Reference |
| --- | --- | --- | --- |
| CAL | CL1C | GAA TTC AAG GAG GCC TTC TC | [1] |
| CL2C | CTT CTG CAT CAT GAG CTG GAC | [1] |
| GAPDH | GDF | GCC GTC AAC GAC CCC TTC ATT GA | [2] |
| GDR | GGG TGG AGT CGT ACT TGA GCA TGT | [2] |
| ITS | ITS-1 | CTT GGT CAT TTA GAG GAA GTA A | [3] |
| ITS-4 | TCC TCC GCT TAT TGA TAT GC | [4] |
| TUB2 | T1 | AAC ATG CGT GAG ATT GTA AGT | [5] |
| Bt2b | ACC CTC AGT GTA GTG ACC CTT GGC | [6] |
| EF1  RPB2  LSU | EF1-728F  EF1-986R  RPB2-P2F  RPB2-P3R  LROR  LR7 | CAT CGA GAA GTT CGA GAA GG  TAC TTG AAG GAA CCC TTA CC  GGA AGT GGT GGA GGA GTA CGA G  CTG GTT GTG GTC GGG GAA GGG  GTA CCC GCT GAA CTT AAG C  TAC TAC CAC CAA GAT CT | [7]  [7]  [8]  [8]  [9]  [9] |

**References**

1. Weir, B.S.; Johnston, P.R.; Damm, U. The *Colletotrichum gloeosporioides* species complex. *Studies in Mycology.* 2012, *73***,** 115-180.

2. Templeton, M.D.; Rikkerink, E.; Solon, S.L.; Crowhurst, R.N. Cloning and molecular characterization of the glyceraldehyde-3-phosphate dehydrogenase-encoding gene and cDNA from the plant pathogenic fungus *Glomerella cingulata*. *Gene.* 1992, *122***,** 225-230.

3. Gardes, M.; Bruns, T.D. ITS primers with enhanced specificity for basidiomycetes - application to the identification of mycorrhizae and rusts. *Molecular ecology.* 1993, *2***,** 113-118.

4. White, T.; Bruns, T.; Lee, S.; Taylor, J. Amplification and direct sequencing of fungal ribosomal RNA genes for phylogenetics. *PCR protocols: a guide to methods and applications.* 1990, *18*, 315-322.

5. O'Donnell, K.; Cigelnik, E. Two divergent intragenomic rDNA ITS2 types within a monophyletic lineage of the fungus *Fusarium* are nonorthologous. *Molecular Phylogenetics & Evolution.* 1997, *7***,** 103-116.

6. Glass, N.L.; Donaldson, G.C. Development of primer sets designed for use with the PCR to amplify conserved genes from filamentous ascomycetes. *Applied and environmental microbiology.* 1995, *61***,** 1323-1330.

7. Carbone, I.; Kohn, L.M. A method for designing primer sets for speciation studies in filamentous ascomycetes. *Mycologia.* 1999, *91***,** 553-556.

8. Liu, Y.J.; Whelen S, Hall, B.D. Phylogenetic relationships among ascomycetes: evidence from an RNA polymerse II subunit. *Molecular biology and evolution.* 1999, *16***,** 1799-1808.

9. Vilgalys, R.; Hester, M. Rapid genetic identification and mapping of enzymatically amplified ribosomal DNA from several *Cryptococcus* species. *Journal of bacteriology*.1990, *172***,** 4238-4246.

**Table S2.** Isolates *Diaporthales* spp. studied and GenBank accession numbers of the generated sequences

| Species | Accession number | GenBank accession | | | |
| --- | --- | --- | --- | --- | --- |
| ITS | LSU | EF1 | RPB2 |
| *Discula theae-sinensis* | MAFF238240 |  | AB511919 |  |  |
| MAFF238241 |  | AB511920 |  |  |
| MAFF238242 |  | AB511921 |  |  |
| MAFF238243 |  | AB511922 |  |  |
| DX1 | ON453684 | ON340629 | ON366583 | ON568236 |
| DX2 | ON453700 | ON340645 | ON366599 | ON568247 |
| DX3 | ON453689 | ON340634 | ON366588 | ON568240 |
| DX4 | ON453685 | ON340630 | ON366584 | ON568237 |
| DX5 | ON453708 | ON340654 | ON366608 | ON568254 |
| DX6 | ON453691 | ON340636 | ON366590 | - |
| DX7 | ON453688 | ON340633 | ON366587 | ON568239 |
| DX8 | ON453699 | ON340644 | ON366598 | ON568246 |
| DX9 | ON453686 | ON340631 | ON366585 | ON568238 |
| DX10 | ON453687 | ON340632 | ON366586 | - |
| DX11 | ON453723 | ON340669 | ON366623 | ON568266 |
| DX12 | ON453738 | ON340688 | ON366642 | ON568282 |
| DX13 | ON453712 | ON340658 | ON366612 | ON568258 |
| DX14 | ON453741 | ON340691 | ON366645 | ON568285 |
| DX15 | ON453740 | ON340690 | ON366644 | ON568284 |
| DX16 | ON453739 | ON340689 | ON366643 | ON568283 |
| DX23 | ON453704 | ON340649 | ON366603 | ON568250 |
| DX24 | ON453711 | ON340657 | ON366611 | ON568257 |
| DX25 | ON453709 | ON340655 | ON366609 | ON568255 |
| DX26 | ON453702 | ON340647 | ON366601 | ON568249 |
| DX27 | ON453710 | ON340656 | ON366610 | ON568256 |
| DX28 | ON453713 | ON340659 | ON366613 | ON568259 |
| DX29 | ON453725 | ON340671 | ON366625 | - |
| DX30 | ON453737 | ON340683 | ON366637 | ON568277 |
| DX31 | ON453714 | ON340660 | ON366614 | ON568260 |
| DX32 | ON453721 | ON340667 | ON366621 | ON568264 |
| DX33 | ON453724 | ON340670 | ON366624 | ON568267 |
| DX34 | ON453693 | ON340638 | ON366592 | ON568242 |
| DX35 | ON453703 | ON340648 | ON366602 | - |
| DX36 | ON453705 | ON340650 | ON366604 | ON568251 |
| DX37 | ON453706 | ON340651 | ON366605 | ON568252 |
| DX38 | ON453707 | ON340653 | ON366607 | ON568253 |
| DX39 | ON453734 | ON340680 | ON366634 | ON568275 |
| DX40 | - | ON340652 | ON366606 | - |
| DX43 | ON598591 | ON340692 | ON366646 | - |
| DX44 | ON453742 | ON340693 | ON366647 | - |
| DX45 | ON453720 | ON340666 | ON366620 | - |
| DX46 | ON453728 | ON340674 | ON366628 | ON568270 |
| DX47 | ON453726 | ON340672 | ON366626 | ON568268 |
| DX49 | ON453695 | ON340640 | ON366594 | ON568243 |
| DX50 | ON453696 | ON340641 | ON366595 | ON568244 |
| DX51 | ON453694 | ON340639 | ON366593 | - |
| DX52 | ON453731 | ON340677 | ON366631 | - |
| DX54 | ON453697 | ON340642 | ON366596 | ON568245 |
| DX55 | ON453729 | ON340675 | ON366629 | ON568271 |
| DX56 | ON453698 | ON340643 | ON366597 | - |
| DX57 | ON453715 | ON340661 | ON366615 | ON568261 |
| DX58 | ON453732 | ON340678 | ON366632 | ON568273 |
| DX59 | ON453690 | ON340635 | ON366589 | - |
| DX60 | ON453733 | ON340679 | ON366633 | ON568274 |
| DX61 | ON453692 | ON340637 | ON366591 | ON568241 |
| DX62 | ON453719 | ON340665 | ON366619 | - |
| DX63 | ON453716 | ON340662 | ON366616 | - |
| DX64 | ON453701 | ON340646 | ON366600 | ON568248 |
| DX65 | ON453718 | ON340664 | ON366618 | ON568263 |
| DX66 | ON453730 | ON340676 | ON366630 | ON568272 |
| DX70 | ON598587 | ON340684 | ON366638 | ON568278 |
| DX71 | ON598590 | ON340687 | ON366641 | ON568281 |
| DX72 | ON598588 | ON340685 | ON366639 | ON568279 |
| DX73 | ON598589 | ON340686 | ON366640 | ON568280 |
| DX74 | ON453722 | ON340668 | ON366622 | ON568265 |
| DX78 | ON453735 | ON340681 | ON366635 | ON568276 |
| DX79 | ON453736 | ON340682 | ON366636 | - |
| DX81 | ON453727 | ON340673 | ON366627 | ON568269 |
| DX82 | ON453717 | ON340663 | ON366617 | ON568262 |
| DX84 | ON453743 | ON340694 | ON366648 | ON568286 |
| *Diaporthales spp.* | DX18 | ON598592 | ON340695 | - | - |
| DX19 | ON598593 | ON340696 | - | - |
|  | DX17 | ON453744 | ON340697 | - | - |
| DX20 | ON453757 | ON340710 | - | - |
| DX21 | ON453756 | ON340709 | - | - |
| DX22 | ON453745 | ON340698 | - | - |
| DX41 | ON453747 | ON340700 | - | - |
| DX42 | ON453749 | ON340702 | - | - |
| DX48 | ON453750 | ON340703 | - | - |
| DX67 | ON453751 | ON340704 | - | - |
| DX68 | ON453753 | ON340706 | - | - |
| DX69 | ON453752 | ON340705 | - | - |
| DX75 | ON453759 | ON340712 | - | - |
| DX76 | ON453755 | ON340708 | - | - |
| DX77 | ON453758 | ON340711 | - | - |
| DX80 | ON453746 | ON340699 | - | - |
| DX83 | ON453748 | ON340701 | - | - |
| DX86 | ON453754 | ON340707 | - | - |
|  | DX85 | ON453760 | - | - | - |
|  | DX89 | ON453761 | ON340713 | - | - |
| *Diaporthe ueckerae* | SLHX3 | KY565424 |  | KY569391 |  |
| DX88 | ON453762 | ON340714 | ON366649 |  |
| *Diaporthe lithocarpus* | CGMCC 3.15175 | KC153104 |  | KC153095 |  |
| DX87 | ON453763 | ON340715 | ON366650 | - |

**Table S3.** Isolates *Colletotrichum* spp. studied and GenBank accession numbers of the generated sequences

| Species | Accession number | GenBank accession | | | |
| --- | --- | --- | --- | --- | --- |
| ITS | CAL | GAPDH | TUB2 |
| *C. aenigma* | ICMP 18608 | JX010244 | JX009683 | JX010044 | JX010389 |
| CX12 | ON329714 | ON420249 | ON394453 | ON420396 |
| CX13 | ON329715 | ON420250 | ON394454 | ON420397 |
| *C. camellia* | ICMP 10643, LF897, LC3667 | JX010224 | JX009630 | JX009908 | JX010436 |
| CX5 | ON329717 | ON420252 | ON394456 | ON420398 |
| CX6 | ON329718 | ON420253 | ON394457 | ON420399 |
| CX7 | ON329719 | ON420254 | ON394458 | ON420400 |
| CX8 | ON329724 | ON420259 | ON394463 | ON420405 |
| CX10 | ON329720 | ON420255 | ON394459 | ON420401 |
| CX25 | ON329727 | ON420262 | ON394466 | ON420408 |
| CX32 | ON329723 | ON420258 | ON394462 | ON420404 |
| CX37 | ON329721 | ON420256 | ON394460 | ON420402 |
| CX38 | ON329722 | ON420257 | ON394461 | ON420403 |
| CX39 | ON329725 | ON420260 | ON394464 | ON420406 |
| CX47 | ON329726 | ON420261 | ON394465 | ON420407 |
| *C. fructicola* | ICMP 18646, CBS 125397 | JX010173 | JX009674 | JX010032 | JX010409 |
| CX1 | ON329690 | ON420225 | ON394429 | ON420372 |
| CX2 | ON329709 | ON420244 | ON394448 | ON420391 |
| CX3 | ON329692 | ON420227 | ON394431 | ON420374 |
| CX4 | ON329691 | ON420226 | ON394430 | ON420373 |
| CX9 | ON329710 | ON420245 | ON394449 | ON420392 |
| CX11 | ON329695 | ON420230 | ON394434 | ON420377 |
| CX14 | ON329703 | ON420238 | ON394442 | ON420385 |
| CX15 | ON329696 | ON420231 | ON394435 | ON420378 |
| CX16 | ON329729 | - | ON394468 | ON420410 |
| CX17 | ON329731 | - | ON394470 | ON420412 |
| CX18 | ON329711 | ON420246 | ON394450 | ON420393 |
| CX19 | ON329704 | ON420239 | ON394443 | ON420386 |
| CX20 | ON329697 | ON420232 | ON394436 | ON420379 |
| CX21 | ON329698 | ON420233 | ON394437 | ON420380 |
| CX22 | ON329699 | ON420234 | ON394438 | ON420381 |
| CX23 | ON329712 | ON420247 | ON394451 | ON420394 |
| CX24 | ON329700 | ON420235 | ON394439 | ON420382 |
| CX26 | ON329694 | ON420229 | ON394433 | ON420376 |
| CX27 | ON329713 | ON420248 | ON394452 | ON420395 |
| CX28 | ON329693 | ON420228 | ON394432 | ON420375 |
| CX29 | ON329706 | ON420241 | ON394445 | ON420388 |
| CX30 | ON329705 | ON420240 | ON394444 | ON420387 |
| CX36 | ON329708 | ON420243 | ON394447 | ON420390 |
| CX40 | ON329707 | ON420242 | ON394446 | ON420389 |
| CX42 | ON329701 | ON420236 | ON394440 | ON420383 |
| CX46 | ON329730 | - | ON394469 | ON420411 |
| CX48 | ON329702 | ON420237 | ON394441 | ON420384 |
| *C. gigasporum* | CBS 125475 | KF687723 | KF687813 | KF687836 | KF687874 |
| CX34 | ON329734 | ON420266 | ON394473 | ON420414 |
| *C. henanense* | LC2820 | KM610182 | KM610176 | KM610178 | KM610184 |
| CX31 | ON329728 | ON420263 | ON394467 | ON420409 |
| *C. karstii* | CBS 132134 | HM585409 | HM582013 | HM585391 | HM585428 |
| CX45 | ON329732 | ON420264 | ON394471 | - |
| *C. siamense* | ICMP 18578*, CBS 130417 | JX010171 | FJ917505 | JX009924 | JX010404 |
| CX41 | ON329716 | ON420251 | ON394455 | - |
| *C. tropicicola* | L58, LC0598* | JN050240 | JN050229 | JN050223 | JN050246 |
| CX33 | ON329733 | ON420265 | ON394472 | ON420413 |
| *C. xanthorroeae* | ICMP 17903, CBS 127831 | JX010261 | JX009653 | JX009927 | JX010448 |
